# Supplementary material for: Reinforcement of double built-in electric fields in spiro-MeOTAD/Ga2O3/Si p–i–n structure for a high-sensitivity solar-blind UV photovoltaic detector
Source: Royal Society of Chemistry journal article supplement (doi:10.1039/d1tc03359j), 2021-01-01
Supplement: d1tc03359j1.pdf [file d1tc03359j1.pdf]

**Reinforcement of Double Built-In Electric Fields in Spiro-  
MeOTAD/Ga<sub>2</sub>O<sub>3</sub>/Si p-i-n Structure for High Sensitivity Solar-blind  
UV Photovoltaic Detector**

Zuyong Yan,<sup>a</sup> Shan Li,<sup>a</sup> Jianying Yue,<sup>a</sup> Xueqiang Ji,<sup>a</sup> Zeng Liu,<sup>b</sup> Yongtao Yang,<sup>a</sup> Peigang Li,<sup>\*a</sup>  
Zhenping Wu,<sup>a</sup> Yufeng Guo,<sup>b</sup> Weihua Tang,<sup>\* a, b</sup>

<sup>a</sup> Laboratory of Information Functional Materials and Devices, School of Science & State Key Laboratory of Information Photonics and Optical Communications, Beijing University of Posts and Telecommunications, Beijing 100876, China.

<sup>b</sup> College of Electronic and Optical Engineering & College of Microelectronics, National and Local Joint Engineering Laboratory for RF Integration and Micro-Packing Technologies, Nanjing University of Posts and Telecommunications, Nanjing 210023, China.

**Corresponding Authors:**

**\*E-mail:** [pgli@bupt.edu.cn](mailto:pgli@bupt.edu.cn).

**\*E-mail:** [whtang@njupt.edu.cn](mailto:whtang@njupt.edu.cn).

# Supporting Information

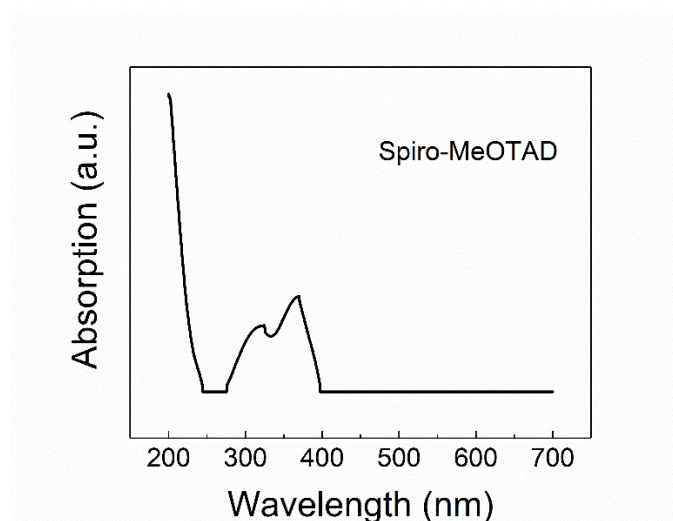

**Figure S1.** UV-*vis* absorption spectra of spiro-MeOTAD.

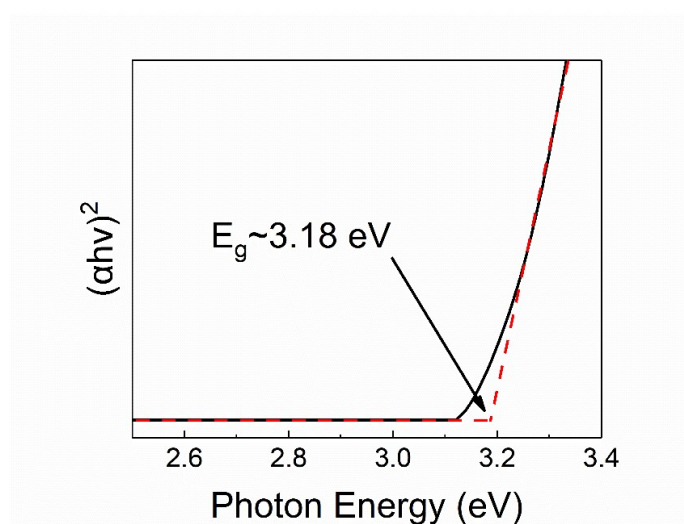

**Figure S2** The estimated band gap of the spiro-MeOTAD film.

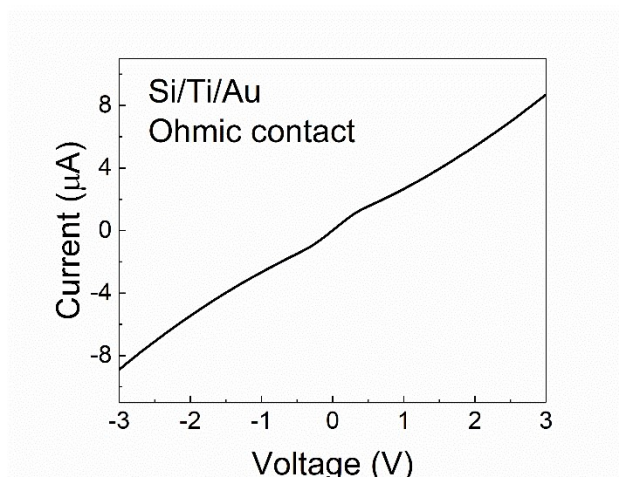

**Figure S3** The  $I$ - $V$  characteristic curve of Au/Ti contact on the Si substrate.

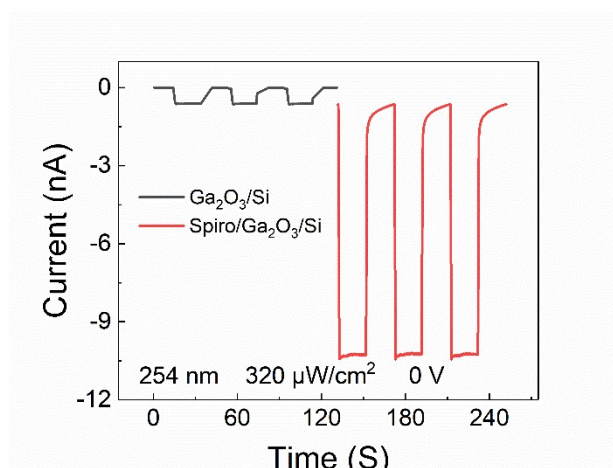

**Figure S4** The time-dependent response of  $\text{Ga}_2\text{O}_3/\text{Si}$  device and spiro/ $\text{Ga}_2\text{O}_3/\text{Si}$  device under 254 nm UV illumination with power intensity of  $320 \mu\text{W}/\text{cm}^2$  at zero bias.

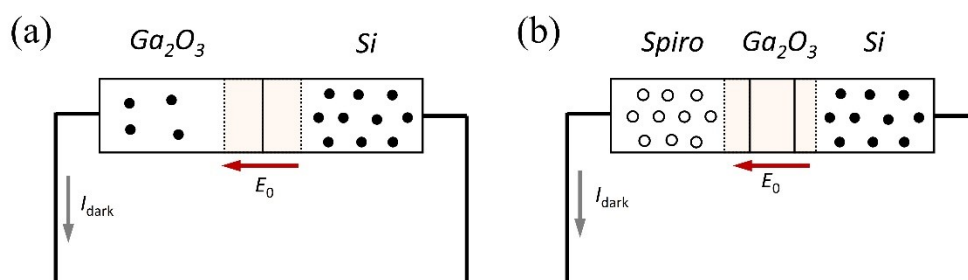

**Figure S5** Schematic diagrams for (a)  $\text{Ga}_2\text{O}_3/\text{Si}$  device and (b) spiro/ $\text{Ga}_2\text{O}_3/\text{Si}$  device under zero bias.

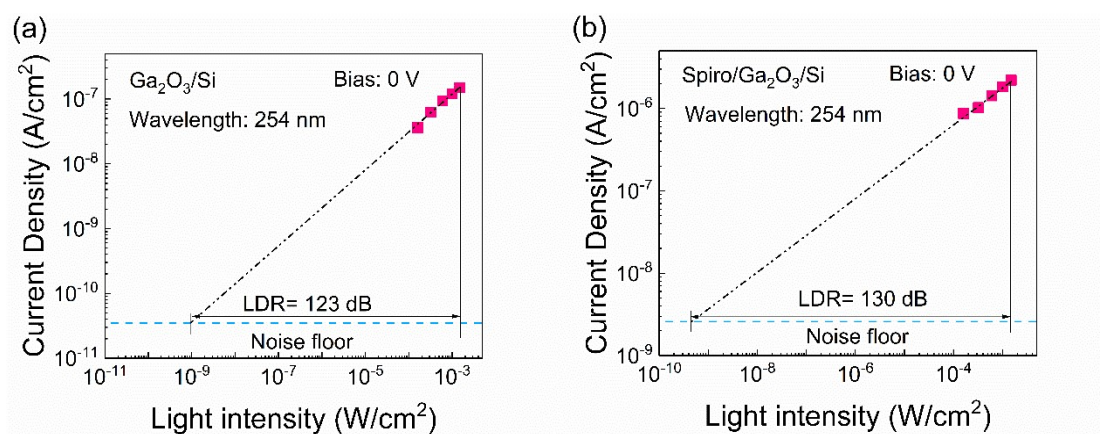

**Figure S6** Linear dynamic ranges of the spiro/ $\text{Ga}_2\text{O}_3/\text{Si}$  and  $\text{Ga}_2\text{O}_3/\text{Si}$  devices. The noise floors are the dark current densities of the corresponding devices which are measured without any light illumination.

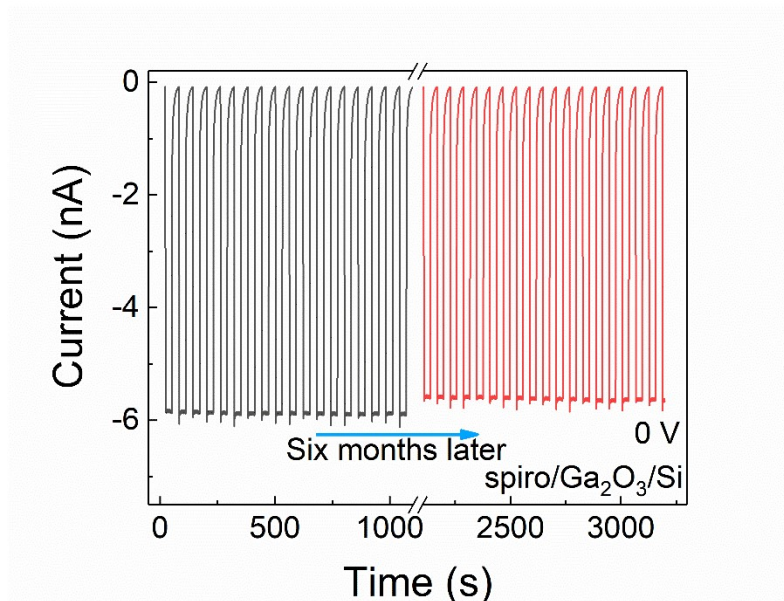

**Figure S7** Temporal responses of the Spiro/Ga<sub>2</sub>O<sub>3</sub>/Si PD tested before and after storage in air for 6 months.
